# Supplementary material
Source: PubMed Central journal article supplement (PMC4701582)

### A. Circulating Inflammatory Markers

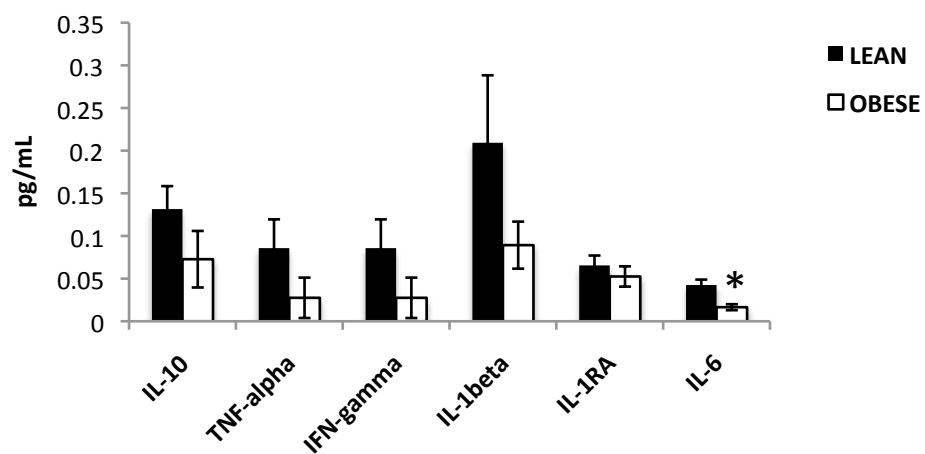

### C. Adipose Tissue T Lymphocytes

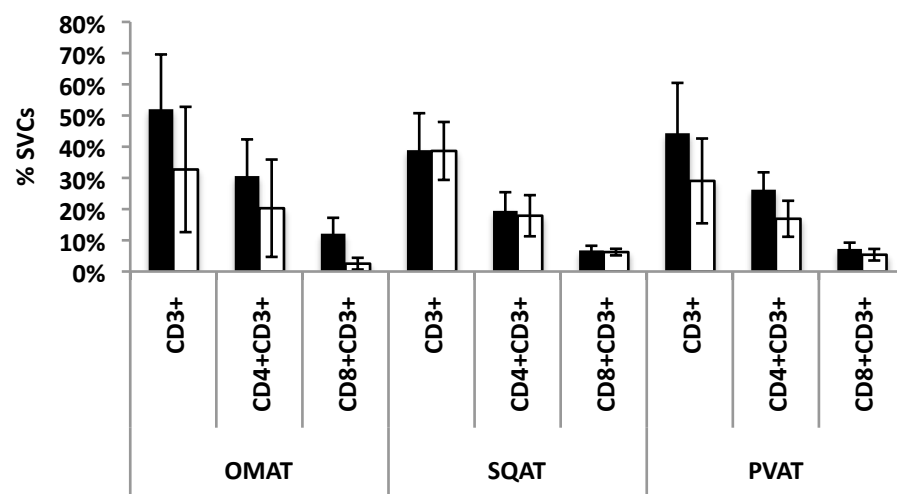

### B. Adipose Tissue Cytokine Production

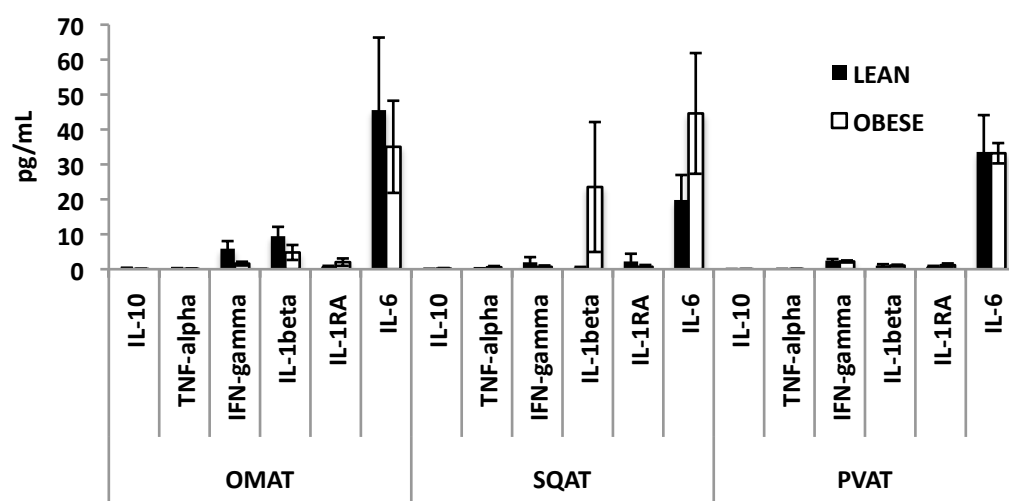

### D. Adipose Tissue Macrophages

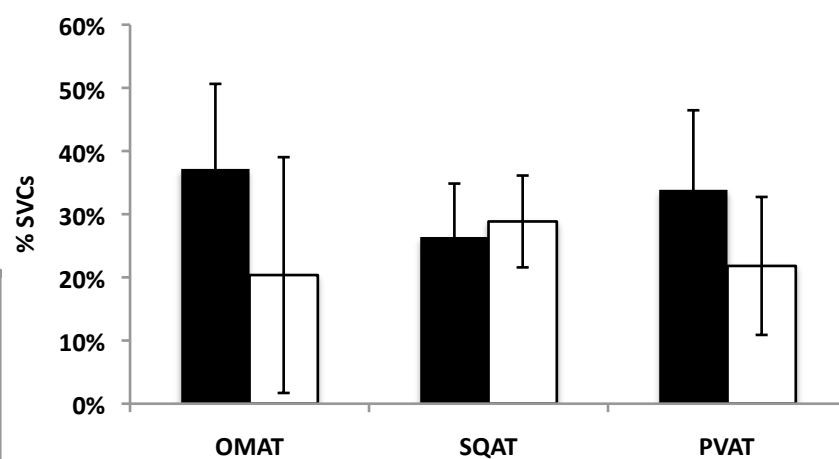

### E. Macrophage Staining

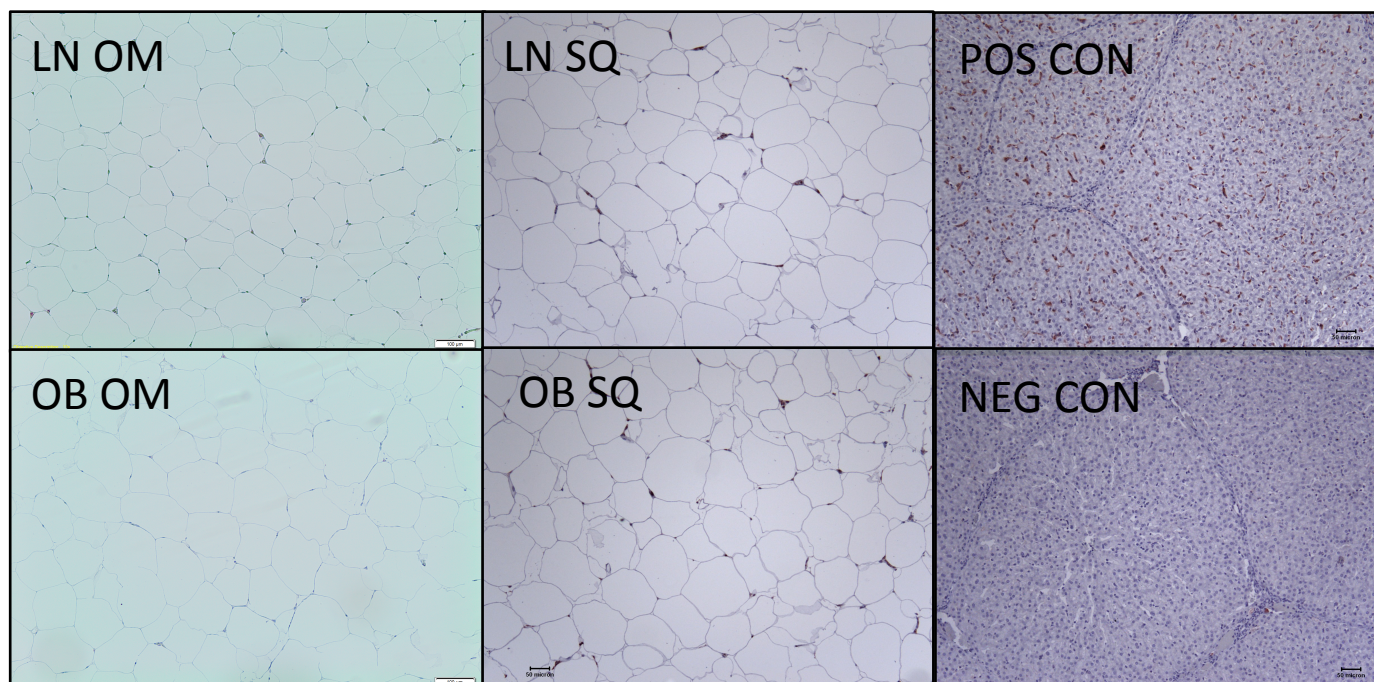

Supplement: NIHMS711825-supplement-supplement_1.pdf [file NIHMS711825-supplement-supplement_1.pdf]
